# Supplementary material for: Thermomechanical properties of polyimide-epoxy nanocomposites from cubic silsesquioxane epoxides
Source: Royal Society of Chemistry journal article supplement (doi:10.1039/b405427j), 2004-01-01
Supplement: b405427j.doc [file b405427j.doc]

Supplementary Data

**Thermomechanical properties of polyimide-epoxy nanocomposites from cubic silsesquioxane epoxides**

Junchao Huang et. al.

Figure S1. FTIR spectra of the neat polyimide and the polyimide-epoxy nanocomposites.
